# Supplementary material for: Transcriptomic Analysis of Persistent Infection with Foot-and-Mouth Disease Virus in Cattle Suggests Impairment of Apoptosis and Cell-Mediated Immunity in the Nasopharynx
Source: PubMed Central journal article supplement (PMC5028045; doi:10.1371/journal.pone.0162750), 2016-09-19

Fig. S1: Correlation between log<sub>2</sub>FC values (non-carriers/carriers) in vaccinated and non-vaccinated animals.

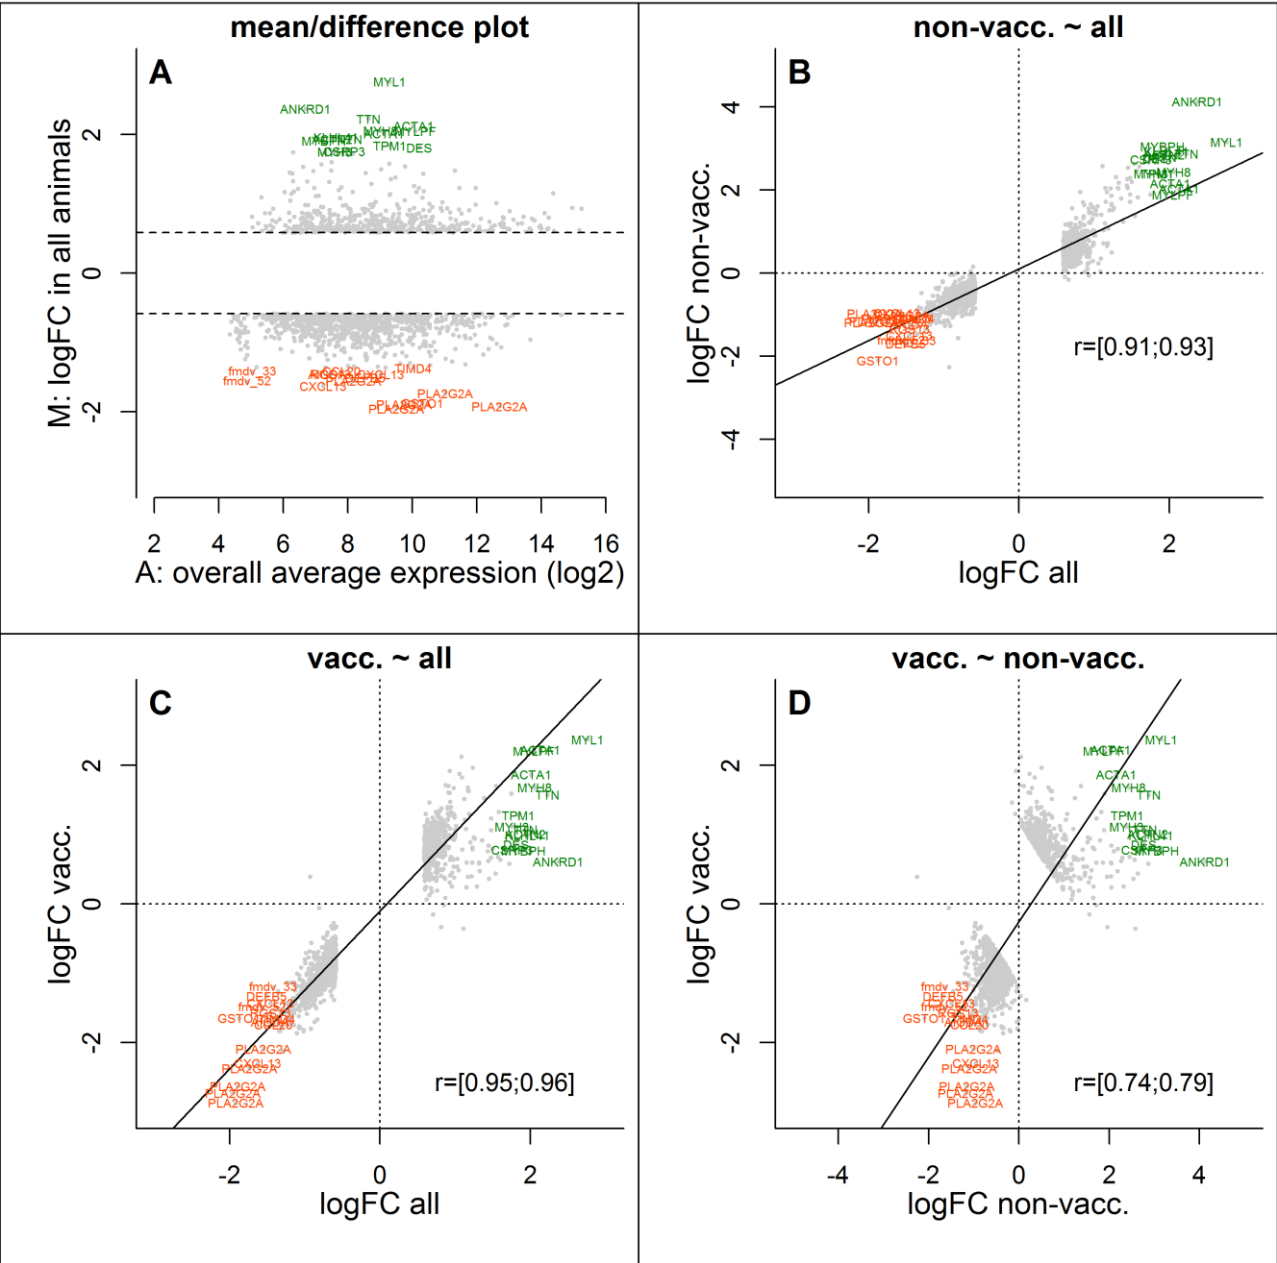

Supplement: pone.0162750.s001.pdf [file pone.0162750.s001.pdf]
