# Supplementary material for: Transcriptomic Analysis of Persistent Infection with Foot-and-Mouth Disease Virus in Cattle Suggests Impairment of Apoptosis and Cell-Mediated Immunity in the Nasopharynx
Source: PubMed Central journal article supplement (PMC5028045; doi:10.1371/journal.pone.0162750), 2016-09-19

Fig. S2: UCSC Genome Browser output for bosTau8, chromosome 23, position 27,535,000-27,544,000.

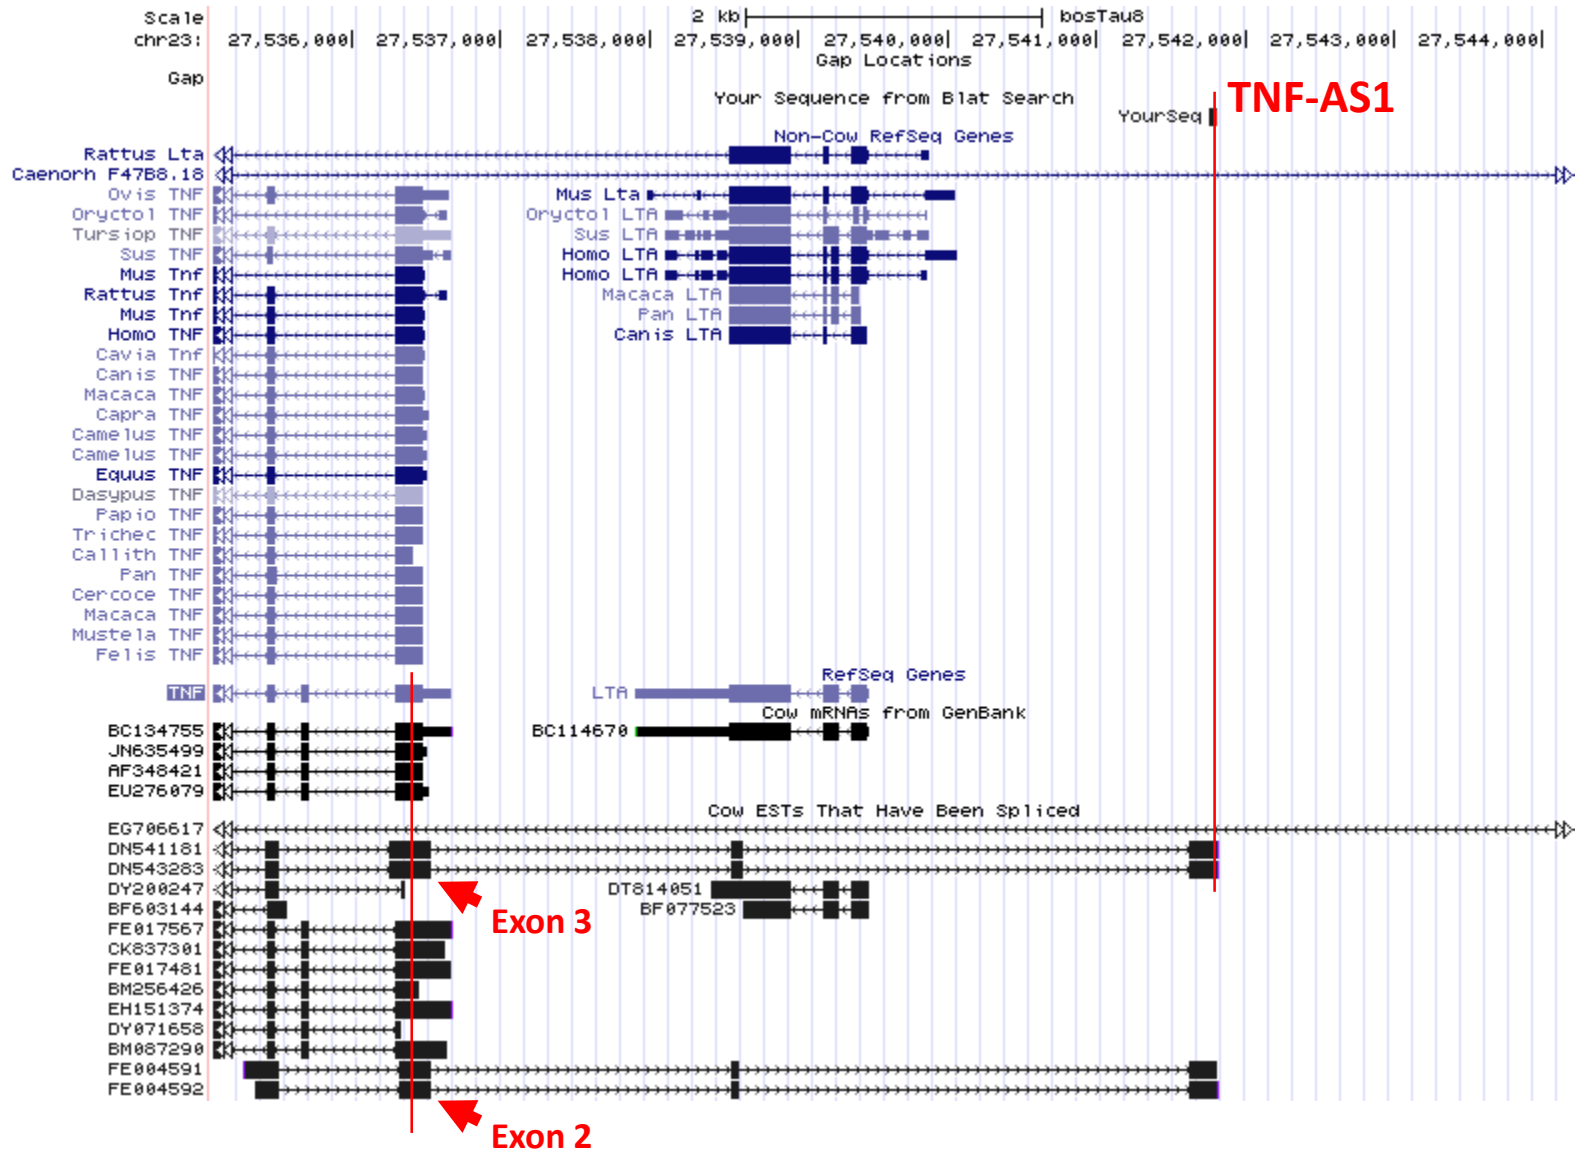

Supplement: pone.0162750.s002.pdf [file pone.0162750.s002.pdf]
